# Supplementary material
Source: publisher figshare collection journal article supplement (https://brill.figshare.com/articles/dataset/_/7981952)
Supplement: Supplementary file 2 [file 1]

**Phylogenetic species delimitation for the widespread spider wasp  
*Ageniella accepta* (Hymenoptera: Pompilidae), with new  
synonyms**

**Cecilia Waichert<sup>a,\*</sup>, Joseph S. Wilson<sup>b</sup>, James P. Pitts<sup>c</sup> and Carol D. von Dohlen<sup>c</sup>**

<sup>a</sup>Universidade Vila Velha, Programa de Pós-Graduação em Ecologia de Ecossistemas, Vila Velha, ES 29.102-920, Brazil

<sup>b</sup>Utah State University, Department of Biology, Tooele, UT 84074, USA

<sup>c</sup>Utah State University, Department of Biology, Logan, UT 84322–5305, USA

\*Corresponding author, e-mail: cwaichert@gmail.com

**Supplementary material**

**S1.** Matrix of 12 morphological characters, with voucher codes and sex.

**S2.** Maximum likelihood topology for *Ageniella accepta* species group recovered from COI.

**S3.** Maximum likelihood topology for *Ageniella accepta* species group recovered from Wg.

**S4.** Maximum likelihood topology for *Ageniella accepta* species group recovered from LWRh.

**S5.** Evolutionary divergence between sequences of COI in the *Ageniella accepta* species group. Analyses were conducted using the Kimura 2-parameter model and gamma distribution (shape parameter-1) for rate variation among sites.
